# Supplementary material for: The Patient, Investigator, Nurse, Carer Questionnaire (PINC-Q): a cross-sectional, retrospective, non-interventional study exploring the impact of less frequent medication administration with paliperidone palmitate 3-monthly as maintenance treatment for schizophrenia
Source: Springer Nature journal article supplement (doi:10.1186/s12888-021-03305-z), 2021-06-09
Supplement: MOESM5 [file 19244054]

# English Nurse Survey One Time

**Welcome to the One Time Nurse Survey. The following questions will ask about you and the care you provide to patients. You only need to complete all questions 1 time.**

Get Started

Cancel

# Age

Tap to answer

Next

Cancel

# Gender

Male

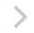

Female

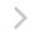

Next

Cancel

## Practice Setting (please select the facility you are working in):

Inpatient facility (i.e. ward for >24- hours hospitalizations)

Outpatient facility

Day hospital

Other

Next

Skip

Cancel

## Type of Facility (please select the option that applies):

Private Facility

Public Facility

Next

Skip

Cancel

## Experience as a psychiatric nurse (in years)

Less than 5

5-10

11-15

>15

Next

Skip

Cancel

# How many patients living with schizophrenia do you care for in a month?

Tap to answer

Next

Skip

Cancel



# How many long acting injections (LAIs) do you administer for the treatment of patients with schizophrenia? (in a month)

Tap to answer

Next

Skip

Cancel

# How many PP3M injections do you give in a month?

Tap to answer

Next

Skip

Cancel

## Whom do you find important to involve in the treatment decision? (multiple answers)

Patient

Carer

Doctor

Nurse

Other

Next

Skip

Cancel

**On the next screen, please review all of your answers. If there are any unanswered questions, please confirm that you intended not to answer those questions.**

Next

Cancel

## Please review all answers

Welcome to the One Time Nurse Survey. The following questions will ask about you and the care you provide to patients. You only need to complete all questions 1 time. >

Age >

55

Gender >

Male

Practice Setting (please select the facility you are working in): >

Type of Facility (please select the option that applies): >

Experience as a psychiatric nurse (in years) >

How many patients living with schizophrenia do you care for in a month? >

Next

Cancel

**Thank you for completing the form.**

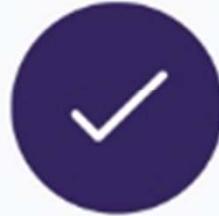

Done

Cancel
