# Supplementary material for: The Patient, Investigator, Nurse, Carer Questionnaire (PINC-Q): a cross-sectional, retrospective, non-interventional study exploring the impact of less frequent medication administration with paliperidone palmitate 3-monthly as maintenance treatment for schizophrenia
Source: Springer Nature journal article supplement (doi:10.1186/s12888-021-03305-z), 2021-06-09
Supplement: MOESM9 [file 19244054]

# Inclusion/Exclusion Survey

## Eligibility Criteria

There are 6 questions in this questionnaire that must be completed by a nurse or psychiatrist for each patient. You must complete these questions to unlock additional questionnaires for the patient, carer, nurse, or psychiatrist. If a patient does not meet any inclusion/exclusion criteria, they are not eligible to participate in this study.

Next

Cancel

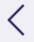

**The next 4 questions are inclusion criteria.**

Get Started

Cancel

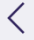

## Be males or females aged $\geq 18$ years

Yes

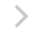

No

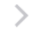

Next

Cancel



## Have a diagnosis of schizophrenia (according to ICD-10)

Yes

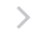

No

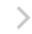

Next

Cancel

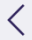

**Be currently receiving PP3M and have previously received 4 to 6 injections of PP3M**

Yes



No



Next

Cancel

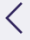

## Have the required language skills to participate in the online questionnaire, in the opinion of the physician

Yes

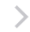

No

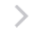

Next

Cancel



**The next 2 questions are exclusion criteria.**

Next

Cancel





## Has received involuntary treatment with PP3M

Yes

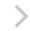

No



Next

Cancel



## Was switched to PP3M treatment within a clinical trial

Yes



No

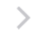

Next

Cancel



**This patient is eligible for the study!**

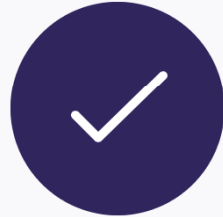

Done

Cancel
