# Supplementary material for: The Patient, Investigator, Nurse, Carer Questionnaire (PINC-Q): a cross-sectional, retrospective, non-interventional study exploring the impact of less frequent medication administration with paliperidone palmitate 3-monthly as maintenance treatment for schizophrenia
Source: Springer Nature journal article supplement (doi:10.1186/s12888-021-03305-z), 2021-06-09
Supplement: MOESM10 [file 19244054]

# Enrolment Task

**By completing this task and the following questions, you are enrolling a new subject in this study. If patient did not complete consent, or you do not wish to do this, please cancel.**

Get Started

Cancel

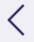

## Did the patient complete a paper consent?

Yes

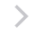

No

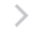

Next

Cancel

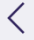

## When did the patient sign the consent form?

Please document date that patient completed consent form

|                 |           |             |
|-----------------|-----------|-------------|
| September       | 7         | 2015        |
| October         | 8         | 2016        |
| November        | 9         | 2017        |
| <b>December</b> | <b>10</b> | <b>2018</b> |
| January         | 11        | 2019        |
| February        | 12        | 2020        |
| March           | 13        | 2021        |

Next

Cancel



## What is patient's gender?

Male

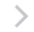

Female

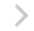

Next

Cancel



## What is the patient's age?

Tap to answer

Next

Cancel

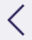

**Success! You enrolled a patient in the study and generated a subject ID for this patient**

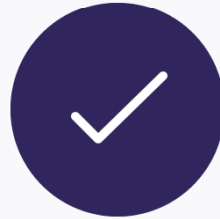

Done

Cancel
